# Supplementary material for: X-ray Raman scattering: a newin situprobe of molecular structure during nucleation and crystallization from liquid solutions
Source: Royal Society of Chemistry journal article supplement (doi:10.1039/c8ce00929e), 2018-01-01
Supplement: c8ce00929e1.pdf [file c8ce00929e1.pdf]

## Supplementary information

### **X-ray Raman Scattering: A New *In Situ* Probe of Molecular Structure during Nucleation and Crystallization from Liquid Solutions**

Laila H. Al-Madhagi,<sup>a,b</sup> Sin-Yuen Chang,<sup>b</sup> Mahalingam Balasubramanian,<sup>c</sup> Anna B. Kroner,<sup>b</sup> Elizabeth J. Shotton,<sup>b</sup> Elizabeth A. Willneff,<sup>d</sup> Bhoopesh Mishra,<sup>a,e</sup> and Sven L. M. Schroeder<sup>a,b</sup>

a.School of Chemical and Process Engineering, University of Leeds, Leeds LS2 9JT, United Kingdom.

b.Diamond Light Source Ltd., Didcot, Oxfordshire, OX11 0DE, United Kingdom.

c.Advanced Photon Source, Argonne National Laboratory, Argonne, Illinois 60439, United States.

d.School of Design, The University of Leeds, Leeds LS2 9JT, United Kingdom

e.Department of Physics, Illinois Institute of Technology, Chicago, IL 60616 USA

Figures S1-S5 show the individual N K-edge spectra of imidazole solid, aqueous solution at 35 °C, aqueous solution at 20 °C, aqueous solution at 13 °C and aqueous solution after crystallization. The individual spectra do not show a sign of time-dependent changes that could be attributed to radiation induced damage. This is expected because spinning of the solid sample and the large stock volume (~ 250 ml) of the aqueous solution accompanied with constant circulation would minimize radiation damage. The same is noticed for the C K-edge individual spectra illustrated in Figures S6-S9

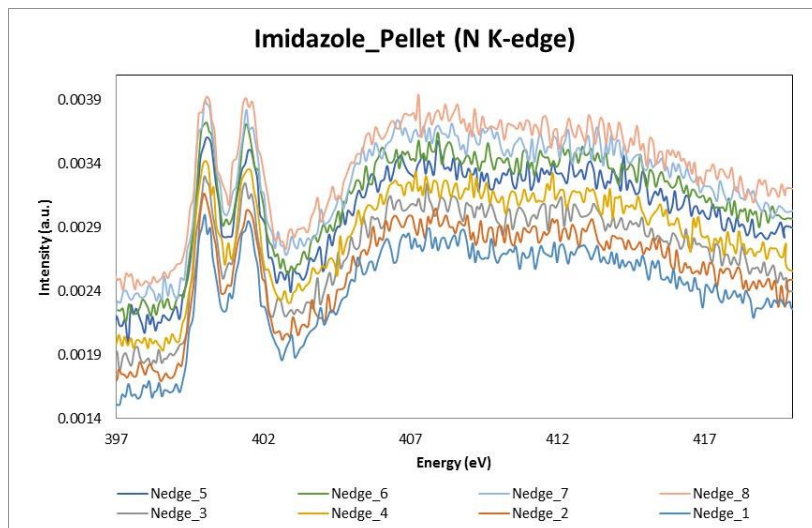

**Figure S1:** Imidazole solid individual N K-edge spectra

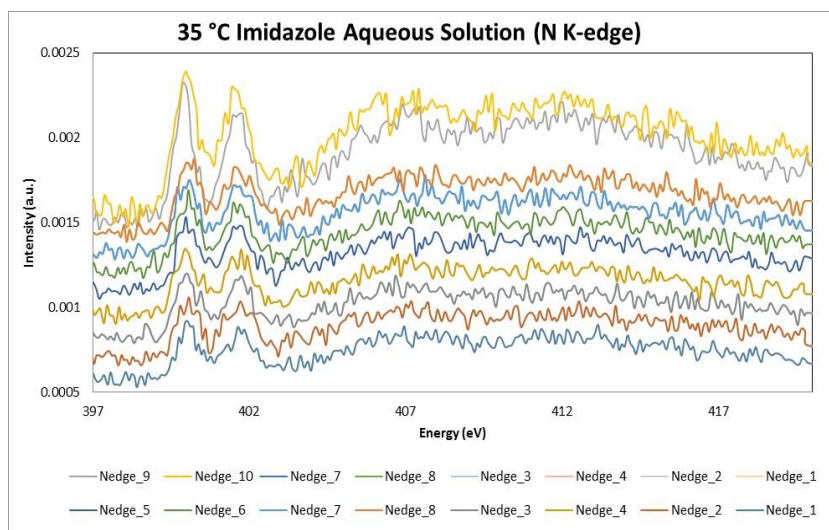

**Figure S2:** Imidazole aqueous solution at 35°C individual N K-edge spectra

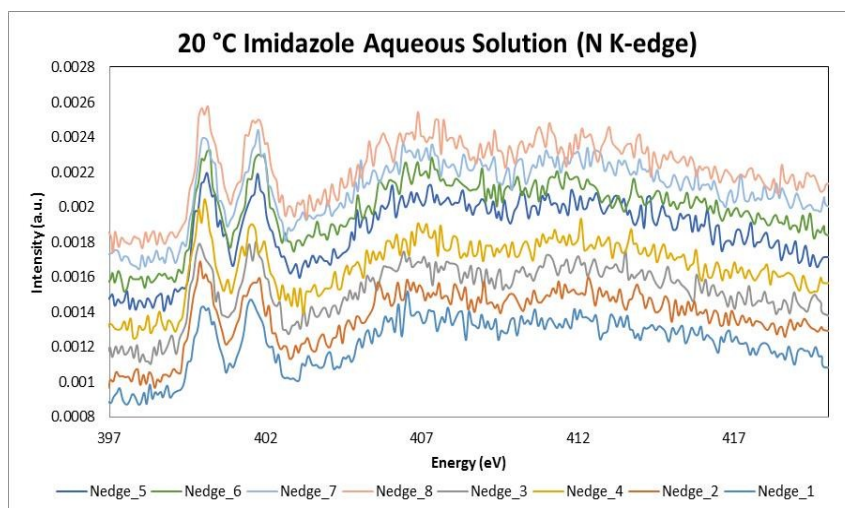

**Figure S3:** Imidazole aqueous solution at 20°C individual N K-edge spectra

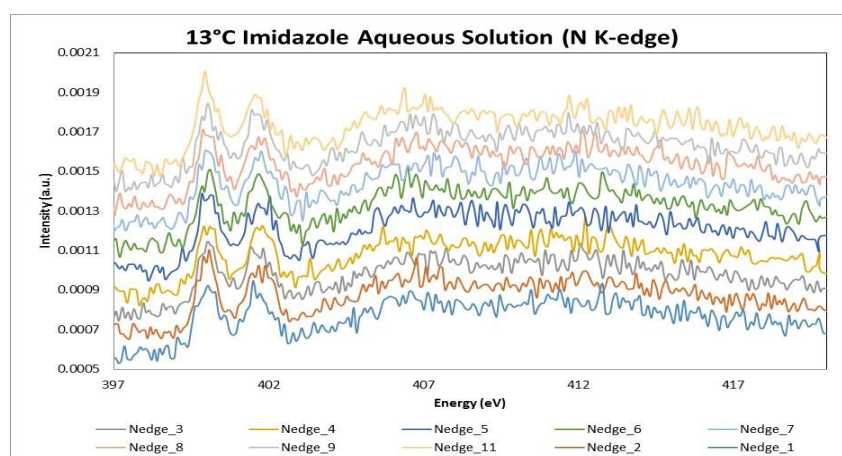

**Figure S4:** Imidazole aqueous solution at 13°C individual N K-edge spectra

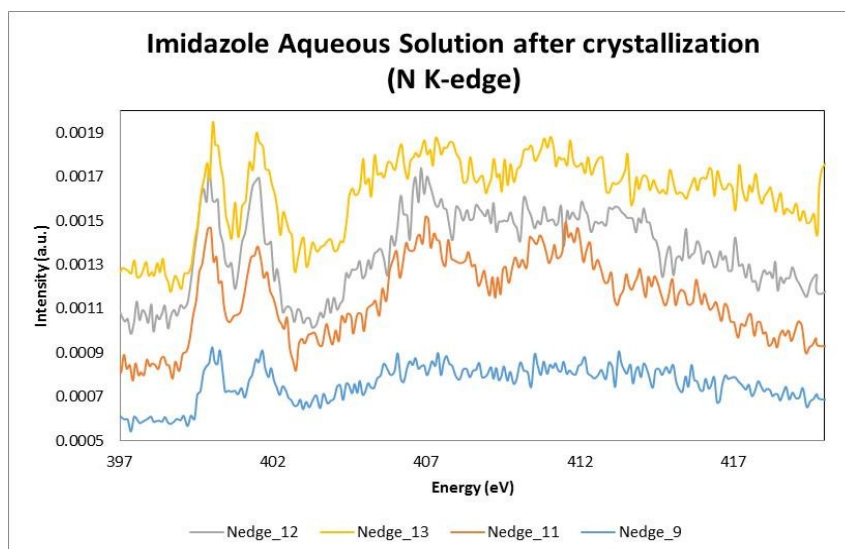

**Figure S5:** Imidazole aqueous solution after crystallization individual N K-edge spectra

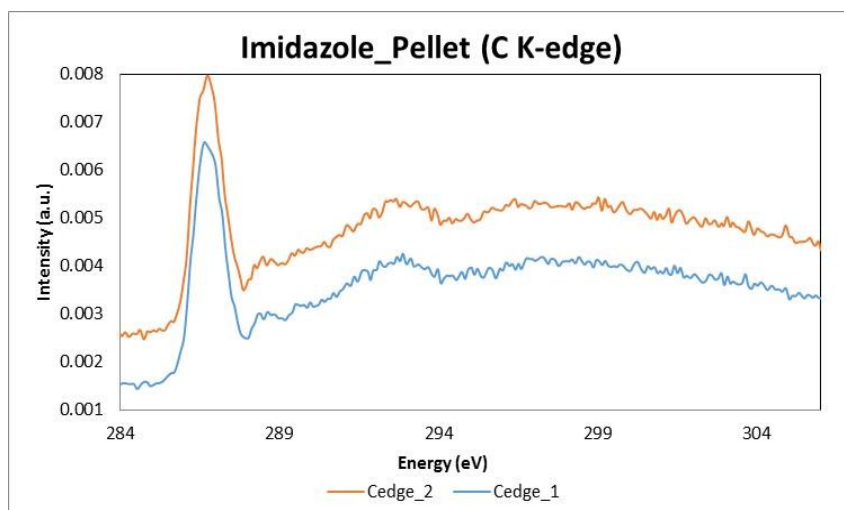

Figure S6: Imidazole solid individual C K-edge spectra

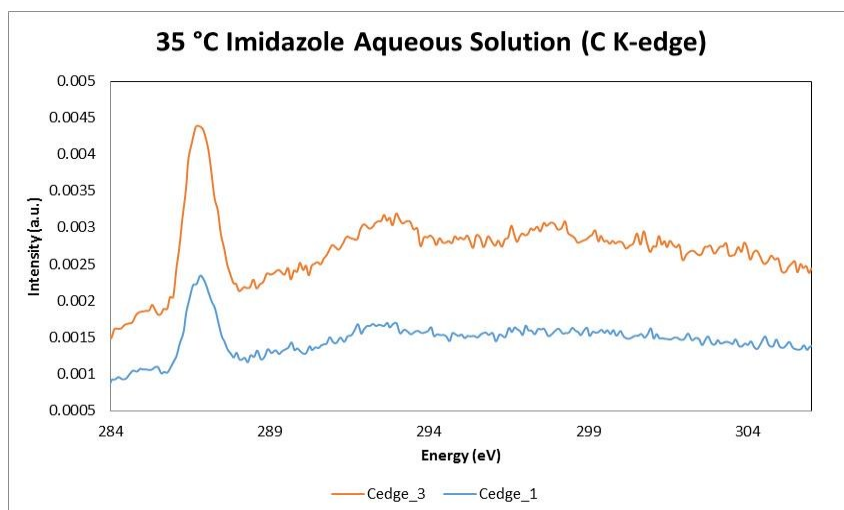

Figure S7: Imidazole aqueous solution at 35°C individual C K-edge spectra

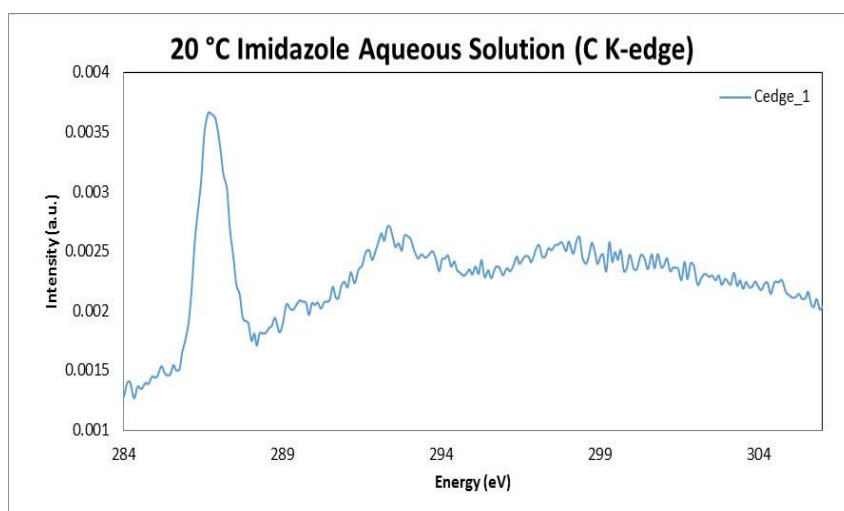

Figure S8: Imidazole aqueous solution at 20°C individual C K-edge spectra

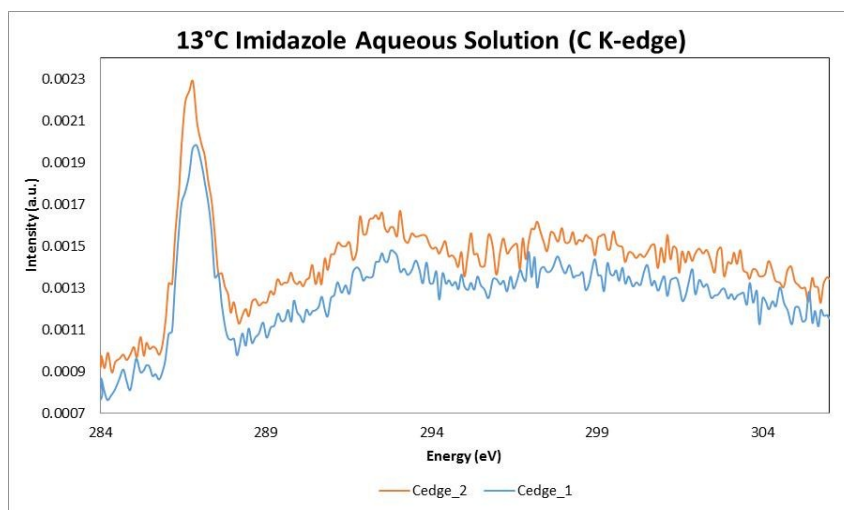

**Figure S9:** Imidazole aqueous solution at 13°C individual C K-edge spectra

Alternative fit for the imidazole aqueous solution C K-edge is illustrated in Figure S10 that is of comparable quality to the fit presented in the paper. The goodness of the fit for the fit below is comparable to the one reported in the main paper.

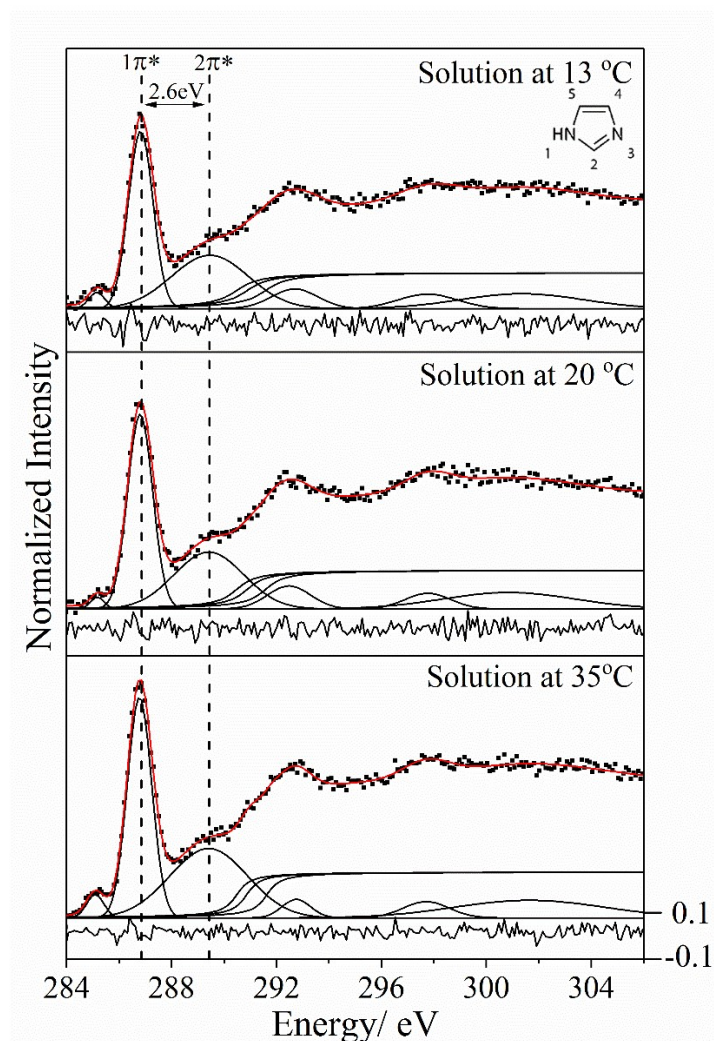

**S10:** Alternative fit for the imidazole aqueous solution C K-edge at 35°C, 20°C and 13°C. Note that the peak at ~ 285 eV is from the Kapton window

**Table S1.** Peak positions and assignments for the alternative fit to the imidazole aqueous solution C K-edge at 35°C, 20°C and 13°C

|                           | Solution  |           |           |
|---------------------------|-----------|-----------|-----------|
|                           | 35 °C /eV | 20 °C /eV | 13 °C /eV |
| <b>E (From Kapton)</b>    | 285.095   | 285.174   | 285.149   |
| <b>E (C 1s–1n*)</b>       | 286.782   | 286.803   | 286.825   |
| <b>E (C 1s–2n*)</b>       | 289.418   | 289.425   | 289.466   |
| <b>ΔE (C2 2n* -C 1n*)</b> | 2.636     | 2.622     | 2.641     |
| <b>IP (C2)</b>            | 291.631   | 291.580   | 291.580   |
| <b>IP (C5)</b>            | 290.860   | 290.880   | 290.880   |
| <b>IP (C4)</b>            | 290.480   | 290.480   | 290.480   |
| <b>ΔIP (C2-C5)</b>        | 0.771     | 0.7       | 0.7       |
| <b>ΔIP (C5-C4)</b>        | 0.380     | 0.4       | 0.4       |
| <b>σ (C-H)</b>            | 292.759   | 292.483   | 292.697   |
| <b>σ (C-C)</b>            | 297.709   | 297.772   | 297.769   |
| <b>σ (C-N)</b>            | 301.641   | 300.867   | 301.352   |

**Table S2.** Full width half maximum (FWHM) values of the  $\pi^*$  peaks in the N K-edge spectra

|                     | Solid /eV | Solution at 35°C<br>/eV | Solution at 20°C<br>/eV | Solution at 13°C<br>/eV | Solution after<br>crystallization /eV |
|---------------------|-----------|-------------------------|-------------------------|-------------------------|---------------------------------------|
| <b>N3(1s-1n*)</b>   | 0.857     | 0.891                   | 0.856                   | 0.876                   | 0.833                                 |
| <b>N1 (1s-1 n*)</b> | 1.161     | 1.178                   | 1.112                   | 1.147                   | 1.182                                 |
