# Supplementary material for: X-ray Raman scattering: a newin situprobe of molecular structure during nucleation and crystallization from liquid solutions
Source: Royal Society of Chemistry journal article supplement (doi:10.1039/c8ce00929e), 2018-01-01
Supplement: c8ce00929e2.zip [file Imidazole_Solid_Solution_APS_August2016_Peak_Parameters.xlsx]

## Sheet: Nedge_380-450eV
Imidazole_Solid_Nedge								Gas	Solution 35	solution 20	solution 13	solution 20 after crystallization	solid
# PeakType	Center	Height	Area	FWHM	parameters...		Gaussian 1	399.872	399.986	400.057	400.049	399.956	400.042
%_1 Gaussian	400.042	1.39797	1.27589	0.857402	1.39797 400.042 0.428701		Gaussian 2	402.316	401.61	401.652	401.681	401.509	401.467
%_2 Gaussian	401.467	1.25597	1.55243	1.16119	1.25597 401.467 0.580593		Gaussian 2 - Gaussian 1	2.444	1.624	1.595	1.632	1.553	1.425
%_3 Atan	402.792	x	x	1.55174	0.497736 402.792 0.77587		Atan 1 (IP N3)	403.859	402.568	402.591	402.661	403.072	402.792
%_4 Atan	404.216	x	x	1.55174	0.497736 404.216 0.77587		Atan 2 (IP N1)	406.303	404.192	404.186	404.293	404.625	404.216
%_5 Gaussian	406.977	0.361214	1.33514	3.47239	0.361214 406.977 1.7362		Atan 2- Atan1	2.444	1.624	1.595	1.632	1.553	1.424
%_6 Gaussian	412.419	0.46371	4.22504	8.55958	0.46371 412.419 4.27979		σ1 (C-N)	406.003	406.787	406.759	406.616	406.933	406.977
							σ2 (C-N)	412.349	412.181	412.239	412.029	411.694	412.419
							σ1-IP(N3) (N3-C4)	2.144	4.219	4.168	3.955	3.861	4.185
							σ2-IP(N3) (N3-C2)	8.49	9.613	9.648	9.368	8.622	9.627
Imidazole_35 degC_Nedge							σ1-IP(N1) (N1-C5)	-0.3	2.595	2.573	2.323	2.308	2.761
# PeakType	Center	Height	Area	FWHM	parameters...		σ2-IP(N1) (N1-C2)	6.046	7.989	8.053	7.736	7.069	8.203
%_7 Gaussian	399.986	1.499	1.42225	0.891335	1.499 399.986 0.445668
%_8 Gaussian	401.61	1.34146	1.68079	1.17708	1.34146 401.61 0.588538
%_9 Atan	402.568	x	x	0.93135	0.506494 402.568 0.465675
%_10 Atan	404.192	x	x	0.93135	0.506494 404.192 0.465675
%_11 Gaussian	412.181	0.506171	4.19019	7.77684	0.506171 412.181 3.88842
%_12 Gaussian	406.787	0.387913	1.01145	2.44951	0.387913 406.787 1.22475
Imidazole_20degC_Nedge
# PeakType	Center	Height	Area	FWHM	parameters...
%_13 Gaussian	400.057	1.51044	1.3756	0.855575	1.51044 400.057 0.427788
%_14 Gaussian	401.652	1.34184	1.58815	1.11188	1.34184 401.652 0.555942
%_15 Atan	402.591	x	x	1.27604	0.512485 402.591 0.638018
%_16 Atan	404.186	x	x	1.27604	0.512485 404.186 0.638018
%_17 Gaussian	412.239	0.462482	3.88191	7.88531	0.462482 412.239 3.94266
%_18 Gaussian	406.759	0.390573	0.98966	2.38041	0.390573 406.759 1.1902
Imidazole_13degC_Nedge
# PeakType	Center	Height	Area	FWHM	parameters...
%_19 Gaussian	400.049	1.54352	1.43986	0.876351	1.54352 400.049 0.438175
%_20 Gaussian	401.681	1.36831	1.67099	1.14725	1.36831 401.681 0.573623
%_21 Atan	402.661	x	x	1.1637	0.516948 402.661 0.581848
%_22 Atan	404.293	x	x	1.1637	0.516948 404.293 0.581848
%_23 Gaussian	412.029	0.471336	4.17726	8.32584	0.471336 412.029 4.16292
%_24 Gaussian	406.616	0.388955	0.955325	2.30738	0.388955 406.616 1.15369
Imidazole_20degC_after-Crystallization_Nedge
# PeakType	Center	Height	Area	FWHM	parameters...
%_25 Gaussian	399.956	1.48281	1.31445	0.832773	1.48281 399.956 0.416386
%_26 Gaussian	401.509	1.30932	1.64751	1.18209	1.30932 401.509 0.591047
%_27 Atan	403.072	x	x	0.937048	0.490148 403.072 0.468524
%_28 Atan	404.625	x	x	0.937048	0.490148 404.625 0.468524
%_29 Gaussian	406.933	0.535316	1.13477	1.99144	0.535316 406.933 0.995718
%_30 Gaussian	411.694	0.518603	3.51291	6.36354	0.518603 411.694 3.18177
Imidazole_gas_phase
# PeakType	Center	Height	Area	FWHM	parameters...
%_55 Gaussian	399.872	1.98673	1.88582	0.891722	1.98673 399.872 0.445861
%_56 Gaussian	402.316	1.87656	2.37312	1.18802	1.87656 402.316 0.59401
%_57 Gaussian	401.073	0.567854	0.515824	0.85336	0.567854 401.073 0.42668
%_58 Atan	403.859	x	x	0.870046	0.502979 403.859 0.435023
%_59 Atan	406.303	x	x	0.870046	0.502979 406.303 0.435023
%_61 Gaussian	406.003	0.40592	1.39574	3.23021	0.40592 406.003 1.61511
%_66 Gaussian	412.349	0.467236	4.91763	9.88751	0.467236 412.349 4.94375

## Sheet: Cedge_275-320eV_3arctan
Imidazole_Solid_Cedge									Gas	Solution 35	solid		solution 20	solution 13
# PeakType	Center	Height	Area	FWHM	parameters...			Gaussian 1	286.573	286.787	286.741		286.808	286.826
%_18 Gaussian	286.741	1.91466	2.11241	1.03647	1.91466 286.741 0.518234			Gaussian 2	289.297	288.769	288.784		288.86	288.827
%_20 Atan	289.424	x	x	0.436196	0.322737 289.424 0.218098			Gaussian 2 - Gaussian 1	2.7235	1.982	2.043		2.052	2.001
%_21 Atan	290.065	x	x	0.436196	0.322737 290.065 0.218098			Atan 1 (IP C4)	290.266	289.497	289.424		289.497	289.497
%_22 Atan	290.887	x	x	0.436196	0.322737 290.887 0.218098			Atan 2 (IP C5)	290.841	289.897	290.065		289.897	289.897
%_23 Gaussian	292.786	0.167699	0.277732	1.55584	0.167699 292.786 0.777918			Atan 3 (IP C2)	291.69	290.697	290.887		290.697	290.697
%_28 Gaussian	297.323	0.128291	0.545151	3.99197	0.128291 297.323 1.99599			Atan 2 - Atan 1	0.575	0.4	0.641		0.4	0.4
%_30 Gaussian	301.206	0.189355	1.58818	7.87935	0.189355 301.206 3.93968			Atan 3 - Atan 2	0.849	0.8	0.822	0	0.8	0.8
%_33 Gaussian	288.784	0.547964	1.37017	2.34904	0.547964 288.784 1.17452			σ1 (C-N)	292.103	292.566	292.786		292.497	292.612
								σ2 (C-N)	297.987	297.655	297.323		297.768	297.729
								σ3 (C-N)	301.266	301.302	301.206		300.68	301.191
								σ1-IP(C4)	1.837	3.069	3.362	C4-H	3	3.115
Imidazole_35 degC_Cedge								σ2-IP(C4)	7.721	8.158	7.899	C4-C5	8.271	8.232
# PeakType	Center	Height	Area	FWHM	parameters...			σ3-IP(C4)	11	11.805	11.782	C4-N3	11.183	11.694
%_17 Gaussian	286.787	1.6399	1.93573	1.10891	1.6399 286.787 0.554455			σ1-IP(C5)	1.262	2.669	2.721	C5-H	2.6	2.715
%_19 Atan	289.497	x	x	x	0.295334 289.497 0.531652			σ2-IP(C5)	7.146	7.758	7.258	C4-C5	7.871	7.832
%_32 Atan	289.897	x	x	x	0.295334 289.897 0.531652			σ3-IP(C5)	9.576	10.605	10.319	N1-C5	9.983	10.494
%_48 Atan	290.697	x	x	x	0.295334 290.697 0.531652			σ1-IP(C2)	0.413	1.869	1.899	C2-H	1.8	1.915
%_51 Gaussian	292.566	0.208237	0.399098	1.80049	0.208237 292.566 0.900244			σ2-IP(C2)	6.297	6.958	6.436		7.071	7.032
%_52 Gaussian	297.655	0.0975227	0.174061	1.67673	0.0975227 297.655 0.838364			σ3-IP(C2)	9.576	10.605	10.319	C2-N	9.983	10.494
%_84 Gaussian	301.302	0.241795	3.1906	12.3963	0.241795 301.302 6.19815
%_95 Gaussian	285.106	0.164338	0.132797	0.759134	0.164338 285.106 -0.379567
%_118 Gaussian	288.769	0.377168	0.882523	2.19816	0.377168 288.769 1.09908
Imidazole_20degC_Cedge
# PeakType	Center	Height	Area	FWHM	parameters...
%_24 Atan	289.497	x	x	x	0.327941 289.497 0.810797
%_31 Atan	289.897	x	x	x	0.327941 289.897 0.810797
%_39 Atan	290.697	x	x	x	0.327941 290.697 0.810797
%_49 Gaussian	297.768	0.119706	0.248463	1.94991	0.119706 297.768 0.974954
%_50 Gaussian	300.68	0.164615	1.28942	7.35858	0.164615 300.68 3.67929
%_90 Gaussian	288.86	0.322584	0.752345	2.191	0.322584 288.86 1.0955
%_97 Gaussian	292.497	0.227114	0.45662	1.88876	0.227114 292.497 0.944382
%_103 Gaussian	285.185	0.0838049	0.046489	0.521133	0.0838049 285.185 0.260566
%_122 Gaussian	286.808	1.67639	1.99375	1.11728	1.67639 286.808 0.558641
Imidazole_13degC_Cedge
# PeakType	Center	Height	Area	FWHM	parameters...
%_106 Gaussian	286.826	1.65487	1.93409	1.09794	1.65487 286.826 0.548972
%_107 Atan	289.497	x	x	x	0.333406 289.497 0.787041
%_108 Atan	289.897	x	x	x	0.333406 289.897 0.787041
%_109 Atan	290.697	x	x	x	0.333406 290.697 0.787041
%_110 Gaussian	297.729	0.123814	0.329833	2.50261	0.123814 297.729 1.2513
%_111 Gaussian	301.191	0.143645	0.913632	5.97513	0.143645 301.191 2.98757
%_112 Gaussian	288.827	0.344392	0.903403	2.46431	0.344392 288.827 1.23216
%_113 Gaussian	292.612	0.200244	0.43621	2.04646	0.200244 292.612 1.02323
%_114 Gaussian	285.17	0.142802	0.102614	0.675057	0.142802 285.17 0.337528
Imidazole_gas_phase
# PeakType	Center	Height	Area	FWHM	parameters...
%_100 Atan	290.266	x	x	0.47521	0.328854 290.266 0.237605
%_101 Atan	290.841	x	x	0.47521	0.328854 290.841 0.237605
%_102 Atan	291.69	x	x	0.47521	0.328854 291.69 0.237605
%_105 Gaussian	297.987	0.194285	0.661461	3.19839	0.194285 297.987 1.5992
%_116 Gaussian	301.266	0.1574	1.17188	6.99434	0.1574 301.266 3.49717
%_117 Gaussian	286.827	2.15254	2.61117	1.1396	2.15254 286.827 0.569799
%_125 Gaussian	292.103	0.273433	0.705836	2.42505	0.273433 292.103 1.21253
%_119 Gaussian	286.32	0.637421	0.369283	0.544253	0.637421 286.32 0.272127
%_121 Gaussian	289.297	0.511289	1.82009	3.34422	0.511289 289.297 1.67211
%_16 Gaussian	287.989	0.230211	0.246034	1.00401	0.230211 287.989 0.502004

## Sheet: Cedge_275-320eV_3arctan_Supp
Imidazole_Solid_Cedge									Gas	Solution 35	solid		solution 20	solution 13
# PeakType	Center	Height	Area	FWHM	parameters...			Gaussian 1	286.573	286.782	286.741		286.803	286.825
%_18 Gaussian	286.741	1.91466	2.11241	1.03647	1.91466 286.741 0.518234			Gaussian 2	289.297	289.418	288.784		289.425	289.466
%_20 Atan	289.424	x	x	0.436196	0.322737 289.424 0.218098			Gaussian 2 - Gaussian 1	2.7235	2.636	2.043		2.622	2.641
%_21 Atan	290.065	x	x	0.436196	0.322737 290.065 0.218098			Atan 1 (IP C4)	290.266	290.48	289.424		290.48	290.48
%_22 Atan	290.887	x	x	0.436196	0.322737 290.887 0.218098			Atan 2 (IP C5)	290.841	290.86	290.065		290.88	290.88
%_23 Gaussian	292.786	0.167699	0.277732	1.55584	0.167699 292.786 0.777918			Atan 3 (IP C2)	291.69	291.631	290.887		291.58	291.58
%_28 Gaussian	297.323	0.128291	0.545151	3.99197	0.128291 297.323 1.99599			Atan 2 - Atan 1	0.575	0.38	0.641		0.4	0.4
%_30 Gaussian	301.206	0.189355	1.58818	7.87935	0.189355 301.206 3.93968			Atan 3 - Atan 2	0.849	0.771	0.822	0	0.7	0.7
%_33 Gaussian	288.784	0.547964	1.37017	2.34904	0.547964 288.784 1.17452			σ1 (C-N)	292.103	292.759	292.786		292.483	292.697
								σ2 (C-N)	297.987	297.709	297.323		297.772	297.769
								σ3 (C-N)	301.266	301.641	301.206		300.867	301.352
								σ1-IP(C4)	1.837	2.279	3.362	C4-H	2.003	2.217
Imidazole_35 degC_Cedge								σ2-IP(C4)	7.721	7.229	7.899	C4-C5	7.292	7.289
# PeakType	Center	Height	Area	FWHM	parameters...			σ3-IP(C4)	11	11.161	11.782	C4-N3	10.387	10.872
%_17 Gaussian	286.782	1.59943	1.86578	1.09588	1.59943 286.782 0.547942			σ1-IP(C5)	1.262	1.899	2.721	C5-H	1.603	1.817
%_19 Atan	290.48	x	x	0.783206	0.333871 290.48 0.391603			σ2-IP(C5)	7.146	6.849	7.258	C4-C5	6.892	6.889
%_32 Atan	290.86	x	x	0.783206	0.333871 290.86 0.391603			σ3-IP(C5)	9.576	10.01	10.319	N1-C5	9.287	9.772
%_48 Atan	291.631	x	x	0.783206	0.333871 291.631 0.391603			σ1-IP(C2)	0.413	1.128	1.899	C2-H	0.903	1.117
%_51 Gaussian	292.759	0.134352	0.183807	1.28524	0.134352 292.759 0.64262			σ2-IP(C2)	6.297	6.078	6.436		6.192	6.189
%_52 Gaussian	297.709	0.117693	0.259224	2.06915	0.117693 297.709 1.03458			σ3-IP(C2)	9.576	10.01	10.319	C2-N	9.287	9.772
%_84 Gaussian	301.641	0.128045	0.91992	6.74924	0.128045 301.641 3.37462
%_95 Gaussian	285.095	0.168576	0.140082	0.780647	0.168576 285.095 -0.390324
%_118 Gaussian	289.418	0.503222	1.86751	3.48635	0.503222 289.418 1.74318
Imidazole_20degC_Cedge
# PeakType	Center	Height	Area	FWHM	parameters...
%_24 Atan	290.48	x	x	1.14245	0.334471 290.48 0.571226
%_31 Atan	290.88	x	x	1.14245	0.334471 290.88 0.571226
%_39 Atan	291.58	x	x	1.14245	0.334471 291.58 0.571226
%_49 Gaussian	297.772	0.134231	0.293523	2.05427	0.134231 297.772 1.02713
%_50 Gaussian	300.867	0.141483	0.893317	5.93157	0.141483 300.867 2.96579
%_90 Gaussian	289.425	0.486929	1.61504	3.11592	0.486929 289.425 1.55796
%_97 Gaussian	292.483	0.197755	0.407192	1.93437	0.197755 292.483 0.967185
%_103 Gaussian	285.174	0.101005	0.0653337	0.60766	0.101005 285.174 0.30383
%_122 Gaussian	286.803	1.66899	1.99007	1.12017	1.66899 286.803 0.560085
Imidazole_13degC_Cedge
# PeakType	Center	Height	Area	FWHM	parameters...
%_106 Gaussian	286.825	1.63827	1.91556	1.09845	1.63827 286.825 0.549224
%_107 Atan	290.48	x	x	1.34623	0.334477 290.48 0.673114
%_108 Atan	290.88	x	x	1.34623	0.334477 290.88 0.673114
%_109 Atan	291.58	x	x	1.34623	0.334477 291.58 0.673114
%_110 Gaussian	297.769	0.134421	0.378154	2.64283	0.134421 297.769 1.32142
%_111 Gaussian	301.352	0.138278	0.807399	5.48533	0.138278 301.352 2.74266
%_112 Gaussian	289.466	0.493276	1.80817	3.44364	0.493276 289.466 1.72182
%_113 Gaussian	292.697	0.182062	0.404004	2.08466	0.182062 292.697 1.04233
%_114 Gaussian	285.149	0.149683	0.115206	0.723055	0.149683 285.149 0.361528
Imidazole_gas_phase
# PeakType	Center	Height	Area	FWHM	parameters...
%_100 Atan	290.266	x	x	0.47521	0.328854 290.266 0.237605
%_101 Atan	290.841	x	x	0.47521	0.328854 290.841 0.237605
%_102 Atan	291.69	x	x	0.47521	0.328854 291.69 0.237605
%_105 Gaussian	297.987	0.194285	0.661461	3.19839	0.194285 297.987 1.5992
%_116 Gaussian	301.266	0.1574	1.17188	6.99434	0.1574 301.266 3.49717
%_117 Gaussian	286.827	2.15254	2.61117	1.1396	2.15254 286.827 0.569799
%_125 Gaussian	292.103	0.273433	0.705836	2.42505	0.273433 292.103 1.21253
%_119 Gaussian	286.32	0.637421	0.369283	0.544253	0.637421 286.32 0.272127
%_121 Gaussian	289.297	0.511289	1.82009	3.34422	0.511289 289.297 1.67211
%_16 Gaussian	287.989	0.230211	0.246034	1.00401	0.230211 287.989 0.502004
